# Supplementary material for: Realization of giant superstructural chirality at broadband optical wavelengths via perovskite dielectric metasurfaces
Source: Royal Society of Chemistry journal article supplement (doi:10.1039/d3ma00953j), 2024-01-01
Supplement: d3ma00953j1.pdf [file d3ma00953j1.pdf]

Electronic Supplementary Material (ESI) for Materials Advances.

This journal is © The Royal Society of Chemistry 2023

## Supplementary Material

# Realization of Giant Superstructural Chirality at Broadband Optical Wavelengths via Perovskite Dielectric Metasurfaces

Aqsa Asad<sup>‡</sup>, Hafiz Saad Khaliq<sup>‡</sup>, Min-Seok Kim, Jae-Won Lee, and Hak-Rin Kim\*

A. Asad, H. S. Khaliq, M.-S. Kim, J.-W. Lee, Prof. H.-R. Kim

School of Electronic and Electrical Engineering

Kyungpook National University

Daegu 41566, Republic of Korea

Prof. H.-R. Kim

School of Electronics Engineering

Kyungpook National University

Daegu 41566, Republic of Korea

E-mail: rineey@knu.ac.kr (H.-R. Kim)

Keywords: Superstructural Chirality, Perovskite, Metasurfaces, Optical Responses, Visible Regime

<sup>‡</sup> These authors have contributed equally to this work.

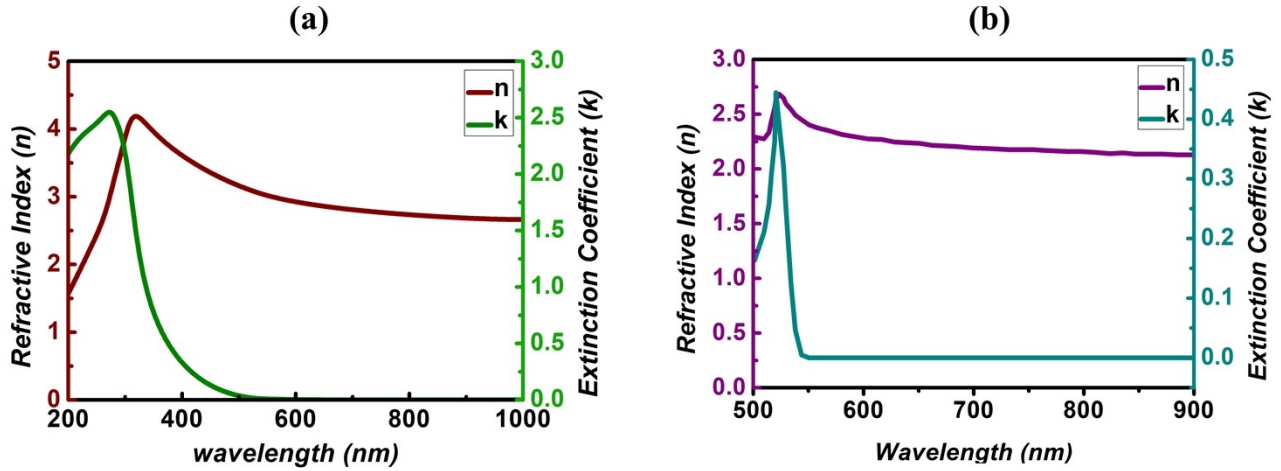

**Fig. S1** Ellipsometry data for low-loss high-index dielectric: **(a)** hydrogenated amorphous silicon ( $a\text{-Si:H}$ )<sup>1</sup> and the perovskite and **(b)** cesium lead bromide ( $\text{CsPbBr}_3$ )<sup>2</sup>.  $a\text{-Si:H}$  depicts the significant transparency at the visible wavelength used for nanostructural engineering.  $\text{CsPbBr}_3$  also shows a lower extinction coefficient at the working wavelengths of visible ranges.

**Table S1** Optimized design parameters

| Parameters                         | Optimal values |
|------------------------------------|----------------|
| Length ( $L_1$ )                   | 205nm          |
| Length ( $L_2$ )                   | 210nm          |
| Width ( $W_1$ )                    | 105nm          |
| Width ( $W_2$ )                    | 85nm           |
| Nanostructures thickness ( $t_1$ ) | 400nm          |
| Perovskite thickness ( $t_2$ )     | 100nm          |
| Substrate thickness ( $t_3$ )      | 200nm          |
| Periodicity in x-direction         | 650nm          |
| Periodicity in y-direction         | 260nm          |
| Relative rotation ( $\delta$ )     | 45°            |

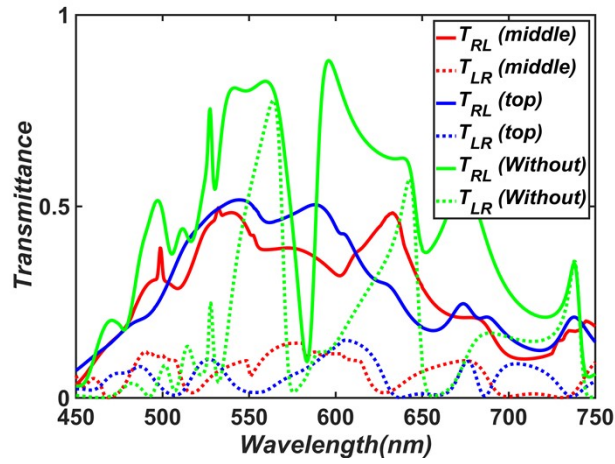

**Fig. S2** Comparison of chiro-optical responses for CP incident light, i.e., (*without*) when no perovskite layer is used, (*middle*) when the perovskite is placed as a middle layer, (*top*) when the perovskite layer is coated on the top of nanostructures.

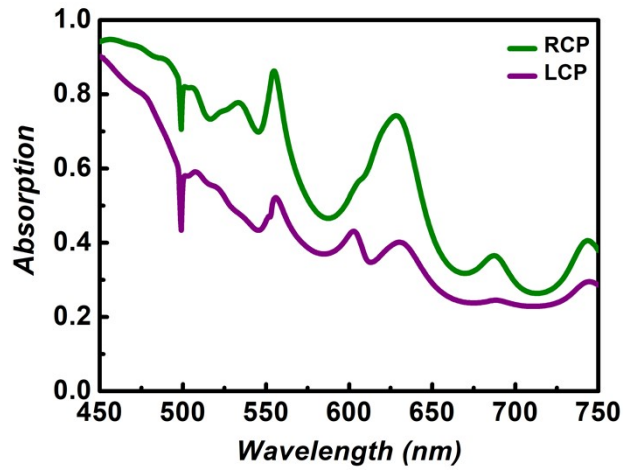

**Fig. S3** Spectral absorption for the L-Enan superstructure. Maximum absorption is demonstrated for the RCP incident light and minimum for the LCP illumination.

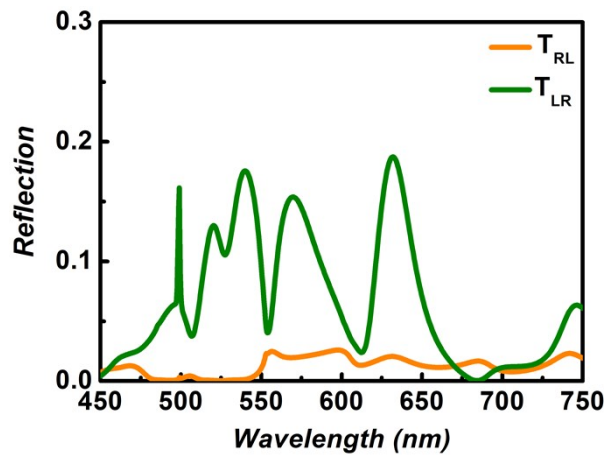

**Fig. S4** Spectral reflection for the L-Enan superstructure, which shows some reflective amplitude for RCP illumination.

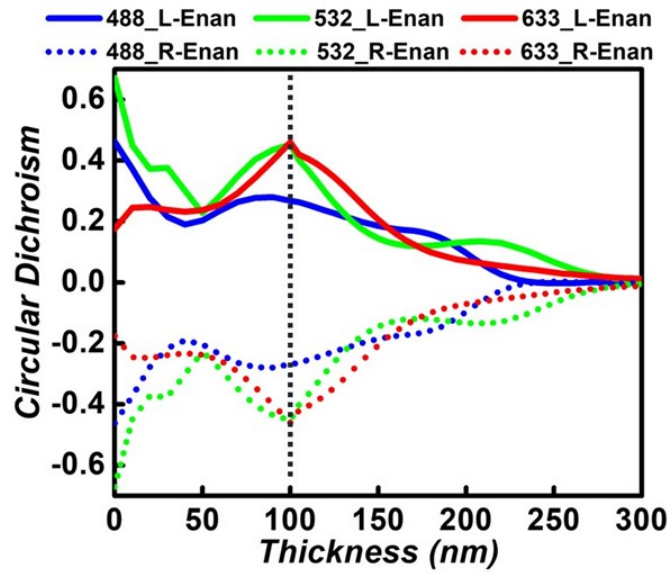

**Fig. S5** Circular dichroism at the working wavelengths for L-Enan and R-Enan, plotted as a function of the thickness of the perovskite layer.

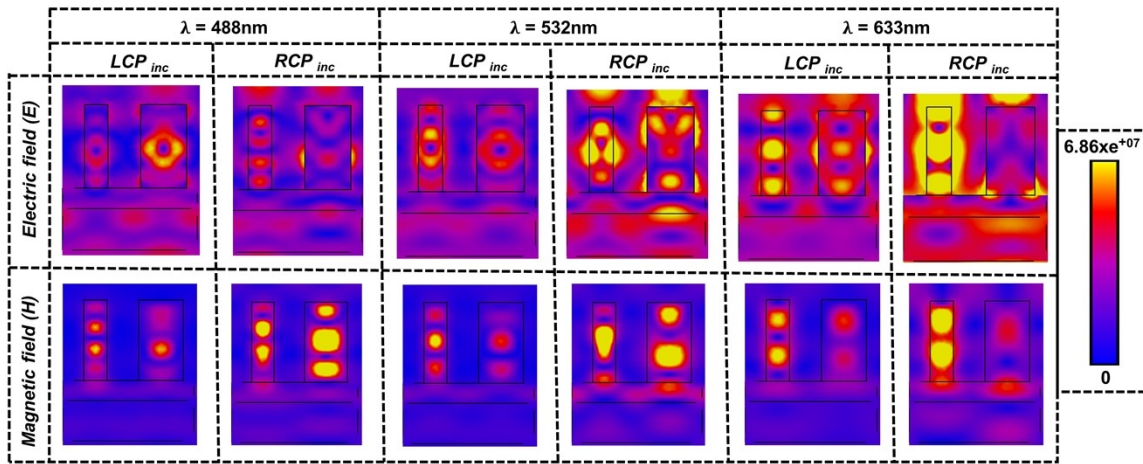

**Fig. S6** Perovskite used as a bottom layer: electric and magnetic field's distributions in the  $xz$ -plane at the working wavelengths of 488 nm, 532 nm, and 633 nm.

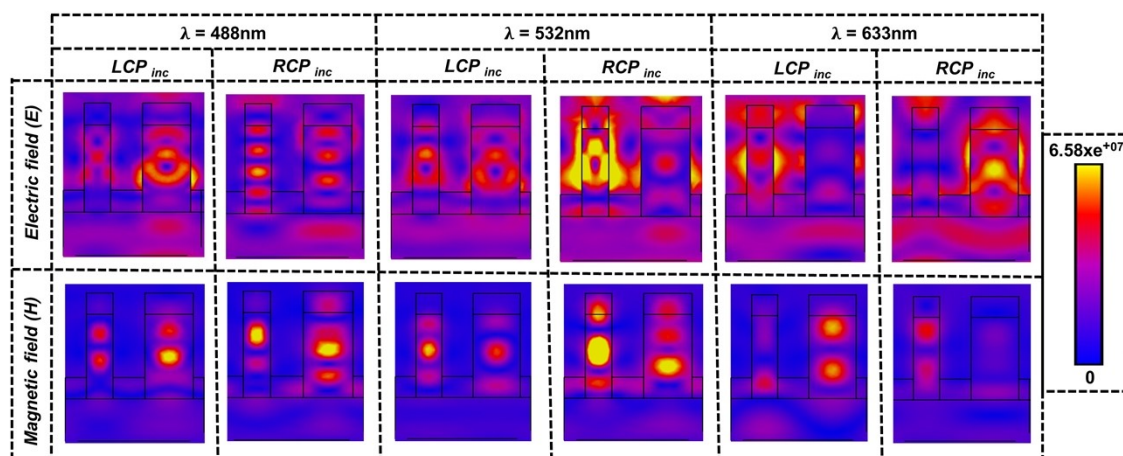

**Fig. S7** Perovskite used as a top layer: electric and magnetic field's distributions in the  $xz$ -plane at the working wavelengths of 488 nm, 532 nm, and 633 nm.

## Fabrication Process:

For Type I design, we anticipate a two-step fabrication process. Firstly, a controlled deposition of a few perovskite layers will be carried out utilizing a solution-based process, such as spin-coating or dip-coating. These methods allow for the controlled deposition of perovskite solution. To achieve uniformity, optimization of the solution concentration, deposition speed, and post-treatment processes will be implemented. Subsequently, nanopillars will be grown on the perovskite layer through techniques like nanosphere lithography or electron-beam lithography, followed by a selective etching process. The etching will define the nanopillar pattern with precision.

For Type II design, nanopillars will first be grown on the glass layer through electron-beam lithography, followed by a selective etching process. Subsequently, the perovskite layer will be placed using the abovementioned methods, such as spin-coating or dip-coating. Additionally, many other techniques can be explored to enhance uniformity over a large area surface.

## References

- 1 Y. Yang, G. Yoon, S. Park, S. D. Namgung, T. Badloe, K. T. Nam and J. Rho, *Advanced Materials*, 2021, **33**, 2005893.
- 2 G. Ermolaev, A. P. Pushkarev, A. Zhizhchenko, A. A. Kuchmizhak, I. Iorsh, I. Kruglov, A. Mazitov, A. Ishteev, K. Konstantinova, D. Saranin, A. Slavich, D. Stosic, E. S. Zhukova, G. Tselikov, A. Di Carlo, A. Arsenin, K. S. Novoselov, S. V. Makarov and V. S. Volkov, *Nano Lett*, 2023, **23**, 2570–2577.
